# Supplementary material for: Characteristics and Comparative Analysis of the Special-Structure (Non-Single-Circle) Mitochondrial Genome of Capsicum pubescens Ruiz & Pav
Source: Genes (Basel). 2024 Jan 24;15(2):152. doi: 10.3390/genes15020152 (PMC10888363; doi:10.3390/genes15020152)
Supplement: Supplementary file 1 [file genes-15-00152-s001.zip › Supplemental table.xlsx]

## Sheet: Table S1
Table S1 Genomic features.
Feature	A %	C %	G %	T %	GC %	Size (bp)	Proportion in Genome (%)
Whole genome	28.84	21.53	21.58	28.05	43.11	93265	100
Protein-coding genes a	27.6	21.5	22	28.9	43.5	8113	8.7
cis-spliced introns a	23.6	26.7	24.7	25	51.4	4106	4.4
tRNA genes a	28.18	21.36	26.82	23.64	48.18	220	0.24
rRNA genes a	-	-	-	-	-	-	-
Non-coding regions	29.3	21.1	21.5	28.1	42.6	80950	86.8
a Protein-coding genes, cis-spliced introns, tRNAs, and rRNAs belong to coding regions.

## Sheet: Table S2
Table S2 Gene profile and organization of PCGs in C. pubescens mt genome.
Gene Name	Length	Start Codon	Stop Codon	Direction
atp1	1530	ATG	TAA	F
atp4	597	ATG	TAG	F
atp6	855	ATG	TGA	F
atp8	471	ATG	TAA	F
atp9	234	ATG	TAG	R
ccmB	621	ATG	TGA	R
ccmC	753	ATG	TGA	F
ccmFc	1317	ATG	TGA	F
ccmFn	1770	ATG	TAG	R
cob	1182	ATG	TGA	R
cox1_1(cir1)	1584	ATG	TAA	F
cox1_2(cir3)	1329	ATG	TAA	R
cox2	768	ATG	TAA	R
cox3	798	ATG	TGA	F
matR	1977	ATG	TGA	F
mttB	825	TTG	TAG	F
nad1	975	ATG	TAA	F/R
nad2	1467	ATG	TAA	F
nad3	357	ATG	TAA	R
nad4	1488	ATG	TGA	R
nad4L	303	ATG	TAA	F
nad5	2010	ATG	TAA	F/R
nad6	657	ATG	TAA	R
nad7	1185	ATG	TAG	F
nad9	573	ATG	TAA	F
rpl2	999	ATG	TAA	F
rpl5	555	ATG	TAA	R
rpl10	480	ATG	TAA	F
rpl16	516	ATG	TAA	R
rps1	429	ATG	TGA	R
rps3	1686	ATG	TAG	R
rps4	1038	ATG	TAA	R
rps7	396	CAT	TAA	F
rps10	363	ACG	TGA	F
rps12	378	ATG	TGA	R
rps13	351	ATG	TGA	F
rps19	285	ATG	TAA	R
sdh3	327	ATG	TGA	F
sdh4	378	ATG	TAA	F
Note: “-“ represents non-existent.

## Sheet: Table S3
Table S3 Codon Usage.
	Capsicum pubesens Ruiz&Pav	Capsicum annuum cultivar Jeju	Capsicum chinense	Chionanthus rupicola	Nicotiana attenuata	Osmanthus fragrans	Peganum harmala	Solanum sisymbriifolium
Ala	0.0634907	0.0618902	0.0619065	0.0629324	0.0615865	0.067355	0.062535	0.0620637
Cys	0.0144256	0.0144442	0.015157	0.014501	0.014795	0.0127085	0.0138967	0.0144401
Asp	0.0315227	0.0320452	0.0310446	0.0310871	0.0328877	0.0328038	0.0317158	0.0336617
Glu	0.0430988	0.0421848	0.0422754	0.041797	0.0434046	0.0431295	0.04169	0.0439897
Phe	0.0656278	0.06696	0.0672936	0.0657758	0.0650624	0.0640985	0.0692592	0.0658889
Gly	0.069813	0.0701167	0.0695763	0.0683348	0.0683601	0.0706116	0.0679144	0.0699053
His	0.0250223	0.0254448	0.0244704	0.0243579	0.0242424	0.0253376	0.0248795	0.0239074
Ile	0.0775601	0.0785345	0.0787071	0.0782864	0.0773619	0.0777601	0.0762076	0.0767907
Lys	0.0435441	0.043237	0.0432798	0.0455881	0.0463458	0.0416203	0.0373193	0.0460935
Leu	0.107035	0.104171	0.107195	0.105772	0.104635	0.106275	0.107811	0.10395
Met	0.0265361	0.0258274	0.026114	0.0260639	0.0259358	0.0254964	0.028914	0.0262025
Asn	0.0313446	0.0310886	0.0311359	0.0317505	0.0318182	0.032645	0.0310434	0.0321316
Pro	0.0549421	0.0550985	0.0545106	0.0539285	0.0541889	0.0517871	0.0570436	0.0551783
Gln	0.0280499	0.0277406	0.0285793	0.0289072	0.0283422	0.031533	0.0279054	0.0283064
Arg	0.0673197	0.0661948	0.0666545	0.0680504	0.0683601	0.0643368	0.0623109	0.0691403
Ser	0.0914515	0.0942223	0.092038	0.0918396	0.0920677	0.0888801	0.0926818	0.0918045
Thr	0.051024	0.0519418	0.0514061	0.0519382	0.0520499	0.0540111	0.0548022	0.0504925
Val	0.0620659	0.0613162	0.0622717	0.0617951	0.0614082	0.0620334	0.0642161	0.0595773
Trp	0.0153161	0.0154008	0.0150657	0.0154488	0.0149733	0.0166799	0.0158019	0.0143445
Tyr	0.0308103	0.0321408	0.0313185	0.0318453	0.0321747	0.0308975	0.032052	0.0321316

## Sheet: Table S4
Table S4 Frequency of identified SSR motifs.
Circle 1
Motif Type	Number of Repeats												Total	Proportion (%)
	3	4	5	6	7	8	9	10	11	12	13	14
Monomer	-	-	-	-	-	14	10	1	0	0	1	1	27	62.79
Dimer	-	11	0	0	1	0	0	0	0	0	0	0	12	27.91
Trimer	-	1	0	0	0	0	0	0	0	0	0	0	1	2.32
Tetramer	3	0	0	0	0	0	0	0	0	0	0	0	3	6.98
Total	3	12	0	0	1	14	10	1	0	0	1	1	43	100
Circle 2
Motif Type	Number of Repeats													Total	Proportion (%)
	3	4	5	6	7	8	9	10	11	12	13	14	15
Monomer	-	-	-	-	-	13	5	4	2	1	0	0	1	26	32.1
Dimer	-	27	7	2	0	0	0	0	0	0	0	0	0	36	44.5
Trimer	-	0	1	0	0	0	0	0	0	0	0	0	0	1	1.2
Tetramer	15	0	0	0	0	0	0	0	0	0	0	0	0	15	18.5
Pentamer	3	0	0	0	0	0	0	0	0	0	0	0	0	3	3.7
Total	18	27	8	2	0	13	5	4	2	1	0	0	1	81	100
Circle 3
Motif Type	Number of Repeats										Total	Proportion (%)
	3	4	5	6	7	8	9	10	11	12
Monomer	-	-	-	-	-	35	14	7	1	8	65	40.63
Dimer	-	65	3	2	0	0	0	0	0	0	70	43.75
Trimer	-	6	2	0	0	0	0	0	0	0	8	5
Tetramer	14	0	0	0	0	0	0	0	0	0	14	8.75
Pentamer	1	0	0	0	0	0	0	0	0	0	1	0.62
Hexamer	2	0	0	0	0	0	0	0	0	0	2	1.25
Total	17	71	5	2	0	35	14	7	1	8	160	100
Circle 4
Motif Type	Number of Repeats											Total	Proportion (%)
	3	4	5	6	7	8	9	10	11	12	13
Monomer	-	-	-	-	-	14	5	3	2		1	25	33.33
Dimer	-	31	4	1	0	0	0	0	0	0	0	36	48
Trimer	-	1	0	0	0	0	0	0	0	0	0	1	1.33
Tetramer	8	0	0	0	0	0	0	0	0	0	0	8	10.67
Pentamer	5	0	0	0	0	0	0	0	0	0	0	5	6.67
Total	13	32	4	1	0	14	5	3	2	0	1	75	100

## Sheet: Table S5
Table S5 Distribution of tandem repeats.
Circle 1
No	Size (bp)	Start	End	Repeat (bp) × Copy Number	Location
1	12	53019	53048	(CTTTTGATTTTT) × 2.4	IGS (trnR(acg), trnM(cat))
2	22	53026	53067	(TTTTTCTTTTGAGTTTTCATTT) × 1.9	IGS (trnR(acg), trnM(cat))
3	9	54643	54672	(TAGACAGCT) × 3.3	IGS (trnR(acg), trnM(cat))
IGS: intergenic pacers.
Circle 2
No	Size (bp)	Start	End	Repeat (bp) × Copy Number	Location
1	15	18817	18847	(TATTATCTTATTTAC) × 2.1	IGS (rrn5, cob)
2	33	19760	19860	(TTAGAACTTTCTCTTATAGTTAAATCACTGCCC) × 3.1	IGS (rrn5, cob)
3	12	20562	20586	(TAGGATTATTAG) × 2.1	IGS (rrn5, cob)
4	21	56106	56177	(AGTTCTGATTCGTAGTGATTT) × 3.4	IGS (ccmFn, mttB)
5	14	63944	63971	(ATCCCATTAATAAC) × 2	IGS (mttB, atp9)
6	7	72019	72046	(TGCTTAA) × 4	IGS (atp9, trnD(gtc))
7	37	81172	81246	(AACAACGAATTCAGTGCTTTCTCATGTCCCTTCCAGT) × 2	IGS (atp9, trnD(gtc))
IGS: intergenic pacers.
Circle 3
No	Size (bp)	Start	End	Repeat (bp) × Copy Number	Location
1	21	2710	2749	(GTACGTAGTAGCTCGACCAAC) × 1.9	IGS (trnT(ggt), atp8)
2	8	77484	77550	(TAATACAA) × 7.9	rpl2-intron
3	18	77480	77550	(ATATTAATACAATAATAC) × 3.6	rpl2-intron
4	19	80103	80140	(CACTAAAGAACTGCTTATA) × 2	IGS (ccmB, trnK(ttt))
5	33	103128	103216	(AAAAAGCTTATGATGAGCTTGAGTCGAGTCAAT) × 2.7	IGS (trnW(cca), nad5-exon1)
6	28	125462	125518	(AACTGTGCCACCTTCCTTCTACTAGTTG) × 2	IGS (nad2-exon5, atp1)
7	14	137929	137971	(AATCAATCAGATAA) × 3.1	IGS (atp1, trnE(ttc))
8	25	162662	162711	(CATTGATTCCTCCTAAATTGCATTG) × 2	IGS (cox1, trnL(caa))
9	20	162683	162723	(ATTGCATTGATTCATCCTAA) × 2	IGS (cox1, trnL(caa))
10	14	199238	199265	(AGAATTGAATGAGC) × 2	IGS (nad1-exon1, trnD(gtc))
11	14	204965	205034	(TTATTTCGATTATT) × 4.8	IGS (trnE(ttc), trnT(ggt))
12	13	207603	207628	(GTTGACTCAAAAC) × 2	IGS (trnT(ggt), atp8)
13	18	211198	211249	(TAAAGAGACTCCATCTAA) × 2.9	IGS (trnT(ggt), atp8)
14	12	211807	211873	(GAGACTGATAGT) × 5.3	IGS (trnT(ggt), atp8)
15	39	211782	211883	(GACTGAGAGTGAGAACTATTTCAAAGAGACTGATAGTGA) × 2.6	IGS (trnT(ggt), atp8)
IGS: intergenic pacers.
Circle 4
No	Size (bp)	Start	End	Repeat (bp) × Copy Number	Location
1	13	3697	3722	(ACTAGTTAGTACG) × 2	IGS (rps19, nad1-exon4)
2	18	34441	34500	(ATATCGTCACTATCATCA) × 3.3	IGS (trnL(caa), nad6)
3	15	37635	37665	(AGTAAATAAGATAAT) × 2.1	IGS (trnL(caa), nad6)
4	22	42106	42153	(AAAAAAGAAAATCAGAATAGAA) × 2.2	IGS (nad6, sdh3)
5	20	59168	59209	(AAGAGAGATTCCAAAGAAGG) × 2.1	IGS (nad6, sdh3)
6	26	66045	66117	(AAACGACTTCTACGCTATCAAGCATG) × 2.8	IGS (nad2-exon2, trnM(cat))
7	20	70918	70955	(TTTATATATATTAAATATTA) × 1.9	IGS (nad2-exon2, trnM(cat))
8	26	72679	72745	(GAAAGCAGAAAGCGACTTCTACGCTA) × 2.6	IGS (trnM(cat), ccmC)
9	24	89675	89721	(GGAAGTGTCCGATCATAGCACGAT) × 2	rpl16
IGS: intergenic pacers.

## Sheet: Table S6
Table S6 Predicted RNA editing sites.
Gene	Nt Pos	AA Pos	Align Col	Effect	Score
atp1	7	3	5	CTT (L) => TTT (F)	0.5
atp1	1039	347	349	CCC (P) => TCC (S)	1
atp1	1178	393	395	TCA (S) => TTA (L)	0.9
atp1	1216	406	408	CTT (L) => TTT (F)	1
atp1	1292	431	433	CCG (P) => CTG (L)	0.8
atp1	1415	472	474	CCA (P) => CTA (L)	1
atp1	1490	497	499	CCA (P) => CTA (L)	0.9
atp4	59	20	24	TCT (S) => TTT (F)	0.57
atp4	71	24	28	TCA (S) => TTA (L)	1
atp4	89	30	34	TCA (S) => TTA (L)	1
atp4	215	72	76	TCG (S) => TTG (L)	1
atp4	226	76	80	CCC (P) => TTC (F)	0.57
atp4	227	76	80	CCC (P) => TTC (F)	0.57
atp4	248	83	87	CCT (P) => CTT (L)	1
atp4	251	84	88	CCG (P) => CTG (L)	0.43
atp4	395	132	140	TCA (S) => TTA (L)	1
atp4	416	139	147	ACT (T) => ATT (I)	0.86
atp4	452	151	159	GCC (A) => GTC (V)	0.86
atp4	490	164	172	CCC (P) => TCC (S)	0.57
atp6	133	45	46	CCA (P) => TCA (S)	0.75
atp6	212	71	72	TCA (S) => TTA (L)	1
atp6	269	90	91	CCG (P) => CTG (L)	1
atp6	320	107	108	TCC (S) => TTC (F)	1
atp6	325	109	110	CGC (R) => TGC (C)	0.75
atp6	332	111	112	TCG (S) => TTG (L)	0.67
atp6	350	117	118	TCG (S) => TTG (L)	1
atp6	365	122	123	CCC (P) => CTC (L)	1
atp6	556	186	187	CCT (P) => TCT (S)	1
atp6	581	194	195	TCA (S) => TTA (L)	1
atp6	623	208	209	TCA (S) => TTA (L)	1
atp6	752	251	252	TCA (S) => TTA (L)	1
atp6	760	254	255	CAT (H) => TAT (Y)	1
atp6	767	256	257	TCT (S) => TTT (F)	1
atp6	814	272	273	CAA (Q) => TAA (X)	1
atp8	47	16	16	TCA (S) => TTA (L)	1
atp8	58	20	20	CTC (L) => TTC (F)	1
atp8	77	26	26	CCT (P) => CTT (L)	0.38
atp8	385	129	129	CAT (H) => TAT (Y)	0.75
atp8	443	148	155	CCA (P) => CTA (L)	0.75
atp9	20	7	7	TCA (S) => TTA (L)	1
atp9	50	17	17	TCA (S) => TTA (L)	1
atp9	82	28	28	CTT (L) => TTT (F)	1
atp9	92	31	31	TCG (S) => TTG (L)	1
atp9	182	61	61	TCG (S) => TTG (L)	1
atp9	191	64	64	CCA (P) => CTA (L)	1
atp9	212	71	71	TCA (S) => TTA (L)	1
atp9	223	75	75	CAA (Q) => TAA (X)	1
ccmB	28	10	10	CAT (H) => TAT (Y)	0.89
ccmB	43	15	15	CCC (P) => TCC (S)	0.67
ccmB	80	27	29	TCG (S) => TTG (L)	1
ccmB	128	43	45	TCA (S) => TTA (L)	1
ccmB	137	46	48	TCC (S) => TTC (F)	1
ccmB	149	50	52	CCG (P) => CTG (L)	1
ccmB	154	52	54	CGG (R) => TGG (W)	1
ccmB	160	54	56	CCT (P) => TCT (S)	0.67
ccmB	164	55	57	CCG (P) => CTG (L)	0.89
ccmB	172	58	60	CCT (P) => TCT (S)	0.89
ccmB	179	60	62	CCT (P) => CTT (L)	1
ccmB	193	65	69	CCT (P) => TTT (F)	0.89
ccmB	194	65	69	CCT (P) => TTT (F)	0.89
ccmB	286	96	102	CGG (R) => TGG (W)	1
ccmB	304	102	108	CGT (R) => TGT (C)	0.78
ccmB	313	105	111	CGT (R) => TGT (C)	0.89
ccmB	338	113	119	CCG (P) => CTG (L)	1
ccmB	367	123	129	CGG (R) => TGG (W)	0.78
ccmB	380	127	133	CCA (P) => CTA (L)	0.78
ccmB	424	142	148	CGT (R) => TGT (C)	0.89
ccmB	428	143	149	TCG (S) => TTG (L)	1
ccmB	467	156	164	TCG (S) => TTG (L)	0.89
ccmB	476	159	167	CCA (P) => CTA (L)	0.89
ccmB	485	162	170	TCA (S) => TTA (L)	1
ccmB	494	165	173	TCA (S) => TTA (L)	1
ccmB	503	168	176	CCA (P) => CTA (L)	1
ccmB	512	171	179	TCT (S) => TTT (F)	1
ccmB	514	172	180	CGT (R) => TGT (C)	1
ccmB	551	184	192	TCA (S) => TTA (L)	1
ccmB	554	185	193	TCG (S) => TTG (L)	0.89
ccmB	566	189	197	TCC (S) => TTC (F)	0.78
ccmB	569	190	198	TCT (S) => TTT (F)	0.78
ccmB	572	191	199	CCG (P) => CTG (L)	1
ccmB	596	199	207	TCG (S) => TTG (L)	0.89
ccmB	611	204	212	TCA (S) => TTA (L)	0.89
ccmC	76	26	32	CGG (R) => TGG (W)	0.78
ccmC	103	35	41	CAT (H) => TAT (Y)	1
ccmC	115	39	45	CGG (R) => TGG (W)	0.78
ccmC	133	45	51	CTT (L) => TTT (F)	0.67
ccmC	161	54	60	CCG (P) => CTG (L)	0.78
ccmC	179	60	66	GCG (A) => GTG (V)	0.78
ccmC	184	62	68	CGG (R) => TGG (W)	1
ccmC	281	94	100	ACA (T) => ATA (I)	0.56
ccmC	299	100	106	TCT (S) => TTT (F)	1
ccmC	331	111	117	CGG (R) => TGG (W)	1
ccmC	400	134	140	CTT (L) => TTT (F)	0.89
ccmC	421	141	147	CGT (R) => TGT (C)	0.78
ccmC	446	149	155	CCG (P) => CTG (L)	0.78
ccmC	451	151	157	CCT (P) => TCT (S)	1
ccmC	458	153	159	TCA (S) => TTA (L)	0.78
ccmC	463	155	161	CGT (R) => TGT (C)	1
ccmC	467	156	162	GCT (A) => GTT (V)	0.78
ccmC	473	158	164	CCG (P) => CTG (L)	1
ccmC	497	166	172	TCT (S) => TTT (F)	1
ccmC	548	183	189	TCT (S) => TTT (F)	1
ccmC	568	190	196	CCT (P) => TCT (S)	1
ccmC	575	192	198	CCC (P) => CTC (L)	1
ccmC	605	202	208	TCC (S) => TTC (F)	1
ccmC	608	203	209	CCC (P) => CTC (L)	0.89
ccmC	614	205	211	TCA (S) => TTA (L)	0.78
ccmC	619	207	213	CGT (R) => TGT (C)	0.78
ccmC	650	217	223	CCT (P) => CTT (L)	0.78
ccmC	656	219	225	CCA (P) => CTA (L)	0.89
ccmC	673	225	231	CCT (P) => TCT (S)	0.78
ccmFc	38	13	13	TCC (S) => TTC (F)	0.83
ccmFc	50	17	17	CCT (P) => CTT (L)	1
ccmFc	52	18	18	CGT (R) => TGT (C)	1
ccmFc	103	35	35	CCC (P) => TCC (S)	1
ccmFc	122	41	41	TCC (S) => TTC (F)	1
ccmFc	146	49	49	CCT (P) => CTT (L)	1
ccmFc	151	51	51	CCT (P) => TCT (S)	0.83
ccmFc	155	52	52	TCA (S) => TTA (L)	1
ccmFc	160	54	54	CCT (P) => TCT (S)	0.67
ccmFc	310	104	104	CGT (R) => TGT (C)	0.5
ccmFc	391	131	131	CGT (R) => TGT (C)	1
ccmFc	406	136	136	CGT (R) => TGT (C)	0.83
ccmFc	620	207	209	GCG (A) => GTG (V)	1
ccmFc	704	235	239	GCT (A) => GTT (V)	0.83
ccmFc	1160	387	394	TCG (S) => TTG (L)	1
ccmFc	1234	412	419	CGG (R) => TGG (W)	1
ccmFn	38	13	15	CCG (P) => CTG (L)	1
ccmFn	137	46	48	TCG (S) => TTG (L)	1
ccmFn	142	48	50	CGT (R) => TGT (C)	1
ccmFn	151	51	53	CCT (P) => TCT (S)	0.83
ccmFn	248	83	85	TCA (S) => TTA (L)	1
ccmFn	256	86	88	CGG (R) => TGG (W)	1
ccmFn	283	95	97	CTT (L) => TTT (F)	0.83
ccmFn	364	122	124	CAT (H) => TAT (Y)	0.67
ccmFn	386	129	131	TCC (S) => TTC (F)	0.67
ccmFn	395	132	134	TCG (S) => TTG (L)	0.67
ccmFn	508	170	174	CGT (R) => TGT (C)	0.83
ccmFn	589	197	201	CCT (P) => TTT (F)	0.5
ccmFn	590	197	201	CCT (P) => TTT (F)	0.5
ccmFn	727	243	250	CCT (P) => TTT (F)	0.67
ccmFn	728	243	250	CCT (P) => TTT (F)	0.67
ccmFn	737	246	253	TCA (S) => TTA (L)	0.83
ccmFn	797	266	273	TCA (S) => TTA (L)	1
ccmFn	809	270	277	CCA (P) => CTA (L)	1
ccmFn	824	275	282	TCA (S) => TTA (L)	1
ccmFn	973	325	332	CGC (R) => TGC (C)	1
ccmFn	1117	373	382	CTC (L) => TTC (F)	1
ccmFn	1291	431	456	CGG (R) => TGG (W)	1
ccmFn	1319	440	465	CCA (P) => CTA (L)	1
ccmFn	1351	451	476	CGG (R) => TGG (W)	1
ccmFn	1369	457	482	CGG (R) => TGG (W)	1
ccmFn	1402	468	493	CGG (R) => TGG (W)	1
ccmFn	1420	474	499	CGT (R) => TGT (C)	1
ccmFn	1463	488	513	TCG (S) => TTG (L)	1
ccmFn	1487	496	521	CCA (P) => CTA (L)	1
ccmFn	1499	500	525	TCA (S) => TTA (L)	1
ccmFn	1534	512	537	CCC (P) => TCC (S)	1
ccmFn	1582	528	553	CGG (R) => TGG (W)	0.67
cob	22	8	9	CTC (L) => TTC (F)	0.62
cob	298	100	101	CAC (H) => TAC (Y)	1
cob	325	109	110	CAT (H) => TAT (Y)	1
cob	358	120	121	CGG (R) => TGG (W)	1
cob	568	190	191	CAT (H) => TAT (Y)	0.92
cob	680	227	228	TCT (S) => TTT (F)	1
cob	853	285	286	CAT (H) => TAT (Y)	1
cob	884	295	296	TCG (S) => TTG (L)	0.23
cob	908	303	304	CCA (P) => CTA (L)	1
cob	982	328	329	CAC (H) => TAC (Y)	0.85
cob	1084	362	363	CCT (P) => TCT (S)	1
cox1_1(cir1)	11	4	4	CCG (P) => CTG (L)	0.67
cox1_1(cir1)	242	81	82	TCT (S) => TTT (F)	1
cox1_1(cir1)	254	85	86	TCT (S) => TTT (F)	1
cox1_1(cir1)	452	151	152	TCT (S) => TTT (F)	1
cox1_1(cir1)	551	184	185	TCA (S) => TTA (L)	1
cox1_1(cir1)	590	197	198	CCA (P) => CTA (L)	1
cox1_1(cir1)	668	223	224	TCT (S) => TTT (F)	1
cox1_1(cir1)	746	249	250	CCC (P) => CTC (L)	1
cox1_1(cir1)	761	254	255	TCC (S) => TTC (F)	1
cox1_1(cir1)	1186	396	397	CAC (H) => TAC (Y)	1
cox1_1(cir1)	1405	469	470	CGT (R) => TGT (C)	0.78
cox1_1(cir1)	1433	478	479	TCA (S) => TTA (L)	1
cox1_1(cir1)	1489	497	498	CCA (P) => TCA (S)	1
cox1_1(cir1)	1499	500	501	CCG (P) => CTG (L)	1
cox1_2(cir3)	11	4	4	CCG (P) => CTG (L)	0.67
cox1_2(cir3)	242	81	82	TCT (S) => TTT (F)	1
cox1_2(cir3)	254	85	86	TCT (S) => TTT (F)	1
cox1_2(cir3)	452	151	152	TCT (S) => TTT (F)	1
cox1_2(cir3)	551	184	185	TCA (S) => TTA (L)	1
cox1_2(cir3)	590	197	198	CCA (P) => CTA (L)	1
cox1_2(cir3)	668	223	224	TCT (S) => TTT (F)	1
cox1_2(cir3)	761	254	302	GCT (A) => GTT (V)	1
cox1_2(cir3)	806	269	317	GCT (A) => GTT (V)	1
cox1_2(cir3)	865	289	337	CAC (H) => TAC (Y)	0.78
cox1_2(cir3)	923	308	360	GCC (A) => GTC (V)	1
cox1_2(cir3)	964	322	374	CAC (H) => TAC (Y)	1
cox1_2(cir3)	982	328	380	CCC (P) => TTC (F)	1
cox1_2(cir3)	983	328	380	CCC (P) => TTC (F)	1
cox1_2(cir3)	1012	338	390	CTC (L) => TTC (F)	1
cox1_2(cir3)	1108	370	422	CTT (L) => TTT (F)	1
cox1_2(cir3)	1183	395	451	CAT (H) => TAT (Y)	1
cox1_2(cir3)	1238	413	469	ACC (T) => ATC (I)	1
cox1_2(cir3)	1262	421	497	CCG (P) => CTG (L)	0.22
cox2	71	24	26	TCT (S) => TTT (F)	1
cox2	107	36	38	ACA (T) => ATA (I)	0.89
cox2	161	54	56	TCA (S) => TTA (L)	0.95
cox2	253	85	87	CGG (R) => TGG (W)	1
cox2	278	93	95	CCT (P) => CTT (L)	1
cox2	379	127	129	CGG (R) => TGG (W)	1
cox2	443	148	150	ACG (T) => ATG (M)	1
cox2	476	159	161	TCA (S) => TTA (L)	1
cox2	557	186	188	CCT (P) => CTT (L)	1
cox2	632	211	213	TCG (S) => TTG (L)	0.84
cox2	721	241	243	CCT (P) => TCT (S)	0.79
cox2	742	248	250	CGG (R) => TGG (W)	1
cox3	245	82	83	CCT (P) => CTT (L)	0.92
cox3	298	100	101	CTT (L) => TTT (F)	1
cox3	304	102	103	CGG (R) => TGG (W)	1
cox3	311	104	105	TCT (S) => TTT (F)	0.92
cox3	314	105	106	TCT (S) => TTT (F)	0.92
cox3	419	140	141	CCC (P) => CTC (L)	1
cox3	512	171	172	TCA (S) => TTA (L)	0.75
cox3	653	218	219	TCG (S) => TTG (L)	1
cox3	754	252	253	CGG (R) => TGG (W)	0.92
matR	32	11	31	TCC (S) => TTC (F)	0.62
matR	193	65	85	CCA (P) => TCA (S)	0.75
matR	235	79	99	CCC (P) => TTC (F)	0.62
matR	236	79	99	CCC (P) => TTC (F)	0.62
matR	326	109	129	CCA (P) => CTA (L)	1
matR	797	266	289	CCG (P) => CTG (L)	0.75
matR	1366	456	482	CCA (P) => TCA (S)	0.75
matR	1454	485	511	GCC (A) => GTC (V)	0.62
matR	1457	486	512	CCG (P) => CTG (L)	0.25
matR	1679	560	586	TCC (S) => TTC (F)	1
matR	1700	567	593	CCT (P) => CTT (L)	1
matR	1756	586	612	CAC (H) => TAC (Y)	1
matR	1787	596	622	CCG (P) => CTG (L)	1
matR	1844	615	641	TCA (S) => TTA (L)	0.88
mttB	41	14	14	CCG (P) => CTG (L)	0.88
mttB	79	27	27	CGG (R) => TGG (W)	0.88
mttB	115	39	39	CGT (R) => TGT (C)	0.88
mttB	127	43	43	CCG (P) => TCG (S)	1
mttB	146	49	49	CCA (P) => CTA (L)	1
mttB	193	65	67	CGT (R) => TGT (C)	1
mttB	203	68	70	TCA (S) => TTA (L)	0.75
mttB	217	73	75	CCG (P) => TCG (S)	0.88
mttB	239	80	82	CCA (P) => CTA (L)	0.5
mttB	277	93	95	CAT (H) => TAT (Y)	1
mttB	343	115	117	CTC (L) => TTC (F)	0.88
mttB	359	120	122	TCT (S) => TTT (F)	0.75
mttB	361	121	123	CGC (R) => TGC (C)	0.88
mttB	368	123	125	TCC (S) => TTC (F)	0.5
mttB	389	130	132	CCT (P) => CTT (L)	0.38
mttB	391	131	133	CCC (P) => TCC (S)	0.5
mttB	394	132	134	CGG (R) => TGG (W)	0.62
mttB	422	141	143	CCA (P) => CTA (L)	0.75
mttB	452	151	153	TCG (S) => TTG (L)	0.57
mttB	487	163	165	CAT (H) => TAT (Y)	0.88
mttB	512	171	173	TCG (S) => TTG (L)	0.88
mttB	520	174	176	CCA (P) => TCA (S)	1
mttB	556	186	188	CGT (R) => TGT (C)	0.88
mttB	563	188	190	CCA (P) => CTA (L)	0.62
mttB	569	190	192	CCA (P) => CTA (L)	0.5
mttB	593	198	200	TCC (S) => TTC (F)	0.75
mttB	625	209	211	CCG (P) => TCG (S)	1
mttB	728	243	245	TCG (S) => TTG (L)	0.75
nad1	215	72	75	TCC (S) => TTC (F)	0.9
nad1	265	89	92	CGG (R) => TGG (W)	1
nad1	308	103	106	CCG (P) => CTG (L)	1
nad1	436	146	149	CCT (P) => TCT (S)	0.9
nad1	493	165	168	CGT (R) => TGT (C)	1
nad1	500	167	170	TCG (S) => TTG (L)	0.7
nad1	536	179	182	TCC (S) => TTC (F)	1
nad1	580	194	197	CGT (R) => TGT (C)	1
nad1	635	212	215	TCA (S) => TTA (L)	1
nad1	674	225	228	TCT (S) => TTT (F)	0.9
nad1	683	228	231	TCT (S) => TTT (F)	1
nad1	731	244	248	TCG (S) => TTG (L)	0.9
nad1	737	246	250	TCT (S) => TTT (F)	1
nad1	740	247	251	CCA (P) => CTA (L)	1
nad1	752	251	255	CCG (P) => CTG (L)	1
nad1	776	259	263	TCC (S) => TTC (F)	0.9
nad1	820	274	278	CTT (L) => TTT (F)	0.7
nad1	895	299	303	CGG (R) => TGG (W)	1
nad1	925	309	313	CGG (R) => TGG (W)	1
nad1	934	312	316	CCC (P) => TCC (S)	0.6
nad2	26	9	10	TCC (S) => TTC (F)	0.89
nad2	262	88	89	CTT (L) => TTT (F)	0.56
nad2	308	103	104	TCT (S) => TTT (F)	0.67
nad2	341	114	115	TCC (S) => TTC (F)	0.67
nad2	356	119	120	CCA (P) => CTA (L)	1
nad2	361	121	122	CCT (P) => TCT (S)	1
nad2	367	123	124	CGC (R) => TGC (C)	1
nad2	401	134	135	TCA (S) => TTA (L)	1
nad2	428	143	144	CCT (P) => CTT (L)	1
nad2	497	166	167	TCG (S) => TTG (L)	1
nad2	523	175	176	CCC (P) => TCC (S)	1
nad2	677	226	230	TCC (S) => TTC (F)	1
nad2	788	263	267	TCT (S) => TTT (F)	0.67
nad2	800	267	271	TCA (S) => TTA (L)	1
nad2	809	270	274	TCT (S) => TTT (F)	1
nad2	928	310	314	CAT (H) => TAT (Y)	1
nad2	958	320	324	CGT (R) => TGT (C)	0.78
nad2	962	321	325	ACT (T) => ATT (I)	1
nad2	1028	343	347	TCA (S) => TTA (L)	0.78
nad2	1247	416	420	CCA (P) => CTA (L)	0.67
nad2	1276	426	430	CGT (R) => TGT (C)	1
nad2	1298	433	437	GCG (A) => GTG (V)	1
nad2	1400	467	471	TCA (S) => TTA (L)	0.67
nad2	1409	470	474	CCA (P) => CTA (L)	1
nad2	1457	486	490	TCA (S) => TTA (L)	1
nad3	5	2	2	TCA (S) => TTA (L)	0.79
nad3	44	15	15	CCG (P) => CTG (L)	1
nad3	62	21	21	CCA (P) => CTA (L)	0.95
nad3	146	49	50	TCC (S) => TTC (F)	1
nad3	208	70	71	CCT (P) => TTT (F)	0.95
nad3	209	70	71	CCT (P) => TTT (F)	0.95
nad3	215	72	73	CCG (P) => CTG (L)	1
nad3	230	77	78	TCC (S) => TTC (F)	0.86
nad3	247	83	84	CCT (P) => TCT (S)	1
nad3	251	84	85	CCC (P) => CTC (L)	0.91
nad3	266	89	90	CCA (P) => CTA (L)	1
nad3	275	92	93	TCT (S) => TTT (F)	1
nad3	317	106	107	TCT (S) => TTT (F)	0.95
nad3	344	115	116	TCG (S) => TTG (L)	1
nad3	349	117	118	CGG (R) => TGG (W)	1
nad4	29	10	10	TCT (S) => TTT (F)	0.67
nad4	74	25	25	ACT (T) => ATT (I)	0.89
nad4	77	26	26	CCT (P) => CTT (L)	0.78
nad4	107	36	36	CCG (P) => CTG (L)	1
nad4	154	52	52	CCC (P) => TCC (S)	1
nad4	158	53	53	CCT (P) => CTT (L)	1
nad4	166	56	56	CGG (R) => TGG (W)	1
nad4	197	66	66	TCT (S) => TTT (F)	1
nad4	362	121	121	ACA (T) => ATA (I)	0.89
nad4	376	126	126	CGT (R) => TGT (C)	0.78
nad4	433	145	145	CTT (L) => TTT (F)	1
nad4	436	146	146	CCC (P) => TTC (F)	0.89
nad4	437	146	146	CCC (P) => TTC (F)	0.89
nad4	577	193	193	CTC (L) => TTC (F)	0.67
nad4	608	203	203	TCA (S) => TTA (L)	1
nad4	659	220	220	TCT (S) => TTT (F)	1
nad4	836	279	279	TCC (S) => TTC (F)	1
nad4	887	296	296	TCG (S) => TTG (L)	1
nad4	977	326	326	CCG (P) => CTG (L)	0.78
nad4	1010	337	337	CCG (P) => CTG (L)	1
nad4	1016	339	339	TCA (S) => TTA (L)	1
nad4	1109	370	370	TCA (S) => TTA (L)	1
nad4	1129	377	377	CTC (L) => TTC (F)	1
nad4	1148	383	383	TCT (S) => TTT (F)	0.89
nad4	1151	384	384	TCC (S) => TTC (F)	1
nad4	1172	391	391	TCA (S) => TTA (L)	1
nad4	1307	436	436	GCG (A) => GTG (V)	1
nad4	1355	452	452	CCA (P) => CTA (L)	1
nad4	1373	458	458	TCC (S) => TTC (F)	0.78
nad4	1405	469	469	CGG (R) => TGG (W)	1
nad4	1417	473	473	CAC (H) => TAC (Y)	1
nad4	1433	478	478	CCG (P) => CTG (L)	1
nad4	1438	480	480	CGC (R) => TGC (C)	1
nad4L	8	3	3	CCT (P) => CTT (L)	0.88
nad4L	41	14	14	TCT (S) => TTT (F)	1
nad4L	47	16	16	TCA (S) => TTA (L)	1
nad4L	55	19	19	CGG (R) => TGG (W)	1
nad4L	86	29	29	CCT (P) => CTT (L)	1
nad4L	95	32	32	TCA (S) => TTA (L)	1
nad4L	100	34	34	CCA (P) => TCA (S)	1
nad4L	110	37	37	TCA (S) => TTA (L)	1
nad4L	131	44	44	TCG (S) => TTG (L)	0.88
nad4L	158	53	53	TCG (S) => TTG (L)	1
nad4L	179	60	60	TCA (S) => TTA (L)	0.75
nad4L	188	63	63	TCA (S) => TTA (L)	0.88
nad4L	197	66	66	CCA (P) => CTA (L)	0.88
nad4L	281	94	94	TCT (S) => TTT (F)	0.88
nad5	155	52	52	CCG (P) => CTG (L)	1
nad5	242	81	81	CCG (P) => CTG (L)	1
nad5	358	120	120	CCT (P) => TTT (F)	1
nad5	359	120	120	CCT (P) => TTT (F)	1
nad5	374	125	125	CCA (P) => CTA (L)	0.9
nad5	398	133	133	TCT (S) => TTT (F)	0.9
nad5	539	180	180	CCT (P) => CTT (L)	1
nad5	598	200	200	CGT (R) => TGT (C)	1
nad5	629	210	214	TCT (S) => TTT (F)	0.9
nad5	713	238	242	TCG (S) => TTG (L)	1
nad5	725	242	246	TCA (S) => TTA (L)	1
nad5	835	279	283	CCA (P) => TCA (S)	0.9
nad5	1310	437	441	TCA (S) => TTA (L)	1
nad5	1490	497	501	CCC (P) => CTC (L)	0.8
nad5	1550	517	521	ACC (T) => ATC (I)	0.9
nad5	1568	523	527	CCG (P) => CTG (L)	0.9
nad5	1580	527	531	TCA (S) => TTA (L)	0.8
nad5	1610	537	541	CCC (P) => CTC (L)	0.7
nad5	1895	632	636	TCA (S) => TTA (L)	1
nad5	1916	639	643	TCT (S) => TTT (F)	0.7
nad5	1918	640	644	CGT (R) => TGT (C)	0.7
nad5	1958	653	657	TCG (S) => TTG (L)	0.9
nad6	7	3	5	CTT (L) => TTT (F)	1
nad6	26	9	11	CCT (P) => CTT (L)	0.4
nad6	88	30	32	CTC (L) => TTC (F)	0.7
nad6	95	32	34	CCA (P) => CTA (L)	1
nad6	103	35	37	CGC (R) => TGC (C)	1
nad6	161	54	56	CCA (P) => CTA (L)	1
nad6	191	64	66	TCA (S) => TTA (L)	1
nad6	569	190	192	TCT (S) => TTT (F)	1
nad6	611	204	206	ACA (T) => ATA (I)	0.71
nad7	38	13	13	TCG (S) => TTG (L)	0.75
nad7	77	26	26	TCA (S) => TTA (L)	1
nad7	83	28	28	TCA (S) => TTA (L)	1
nad7	200	67	67	TCT (S) => TTT (F)	1
nad7	209	70	70	TCA (S) => TTA (L)	0.88
nad7	244	82	82	CAT (H) => TAT (Y)	1
nad7	251	84	84	TCA (S) => TTA (L)	1
nad7	316	106	106	CGT (R) => TGT (C)	1
nad7	335	112	112	TCA (S) => TTA (L)	0.88
nad7	344	115	115	TCA (S) => TTA (L)	1
nad7	383	128	128	TCA (S) => TTA (L)	1
nad7	578	193	193	TCA (S) => TTA (L)	0.88
nad7	724	242	242	CAT (H) => TAT (Y)	1
nad7	739	247	247	CCT (P) => TTT (F)	1
nad7	740	247	247	CCT (P) => TTT (F)	1
nad7	769	257	257	CGC (R) => TGC (C)	1
nad7	926	309	310	TCA (S) => TTA (L)	0.88
nad7	944	315	316	CCT (P) => CTT (L)	1
nad7	973	325	326	CCT (P) => TCT (S)	0.88
nad7	1057	353	354	CGT (R) => TGT (C)	1
nad7	1088	363	364	TCA (S) => TTA (L)	1
nad7	1103	368	369	TCT (S) => TTT (F)	1
nad7	1124	375	376	CCA (P) => CTA (L)	1
nad7	1166	389	390	TCT (S) => TTT (F)	1
nad9	92	31	31	TCT (S) => TTT (F)	0.75
nad9	167	56	56	TCG (S) => TTG (L)	0.92
nad9	298	100	100	CCG (P) => TCG (S)	0.83
nad9	328	110	110	CGG (R) => TGG (W)	1
nad9	368	123	123	TCC (S) => TTC (F)	1
nad9	398	133	133	TCA (S) => TTA (L)	1
nad9	439	147	147	CTT (L) => TTT (F)	1
rpl10	101	34	34	TCA (S) => TTA (L)	0.83
rpl10	134	45	45	CCA (P) => CTA (L)	0.83
rpl10	239	80	80	TCG (S) => TTG (L)	0.83
rpl16	37	13	27	CAG (Q) => TAG (X)	1
rpl16	185	62	76	ACT (T) => ATT (I)	1
rpl16	313	105	122	CTC (L) => TTC (F)	0.89
rpl16	488	163	180	TCG (S) => TTG (L)	0.75
rpl2	206	69	72	CCG (P) => CTG (L)	0.75
rpl2	317	106	112	CCA (P) => CTA (L)	1
rpl2	442	148	155	CCC (P) => TCC (S)	1
rpl2	485	162	169	GCG (A) => GTG (V)	0.67
rpl2	508	170	177	CTC (L) => TTC (F)	1
rpl5	35	12	17	TCA (S) => TTA (L)	0.78
rpl5	47	16	21	CCG (P) => CTG (L)	1
rpl5	59	20	25	CCG (P) => CTG (L)	0.89
rpl5	64	22	27	CAC (H) => TAC (Y)	1
rpl5	92	31	36	TCG (S) => TTG (L)	1
rpl5	161	54	63	CCG (P) => CTG (L)	0.44
rpl5	509	170	188	CCA (P) => CTA (L)	0.89
rpl5	512	171	189	CCG (P) => CTG (L)	1
rps10	2	1	1	ACG (T) => ATG (M)	1
rps10	238	80	80	CGG (R) => TGG (W)	0.6
rps10	302	101	101	TCG (S) => TTG (L)	1
rps10	331	111	111	CGA (R) => TGA (X)	1
rps12	104	35	35	CCG (P) => CTG (L)	1
rps12	146	49	49	CCA (P) => CTA (L)	1
rps12	196	66	66	CAC (H) => TAC (Y)	0.94
rps12	269	90	90	TCG (S) => TTG (L)	0.94
rps13	56	19	23	TCA (S) => TTA (L)	0.9
rps13	100	34	38	CGT (R) => TGT (C)	0.9
rps13	287	96	100	TCG (S) => TTG (L)	1
rps19	116	39	60	TCG (S) => TTG (L)	1
rps19	137	46	67	TCC (S) => TTC (F)	0.33
rps19	163	55	76	CCT (P) => TTT (F)	1
rps19	164	55	76	CCT (P) => TTT (F)	1
rps1	158	53	70	CCT (P) => CTT (L)	0.67
rps3	92	31	31	TCA (S) => TTA (L)	0.71
rps3	512	171	176	TCA (S) => TTA (L)	0.71
rps3	713	238	252	TCG (S) => TTG (L)	0.86
rps3	1031	344	365	CCA (P) => CTA (L)	0.86
rps3	1358	453	481	CCG (P) => CTG (L)	1
rps3	1385	462	490	CCG (P) => CTG (L)	0.86
rps3	1549	517	546	CGT (R) => TGT (C)	1
rps3	1582	528	557	CCT (P) => TCT (S)	0.57
rps3	1613	538	567	TCA (S) => TTA (L)	0.86
rps4	38	13	26	TCA (S) => TTA (L)	0.5
rps4	164	55	69	TCA (S) => TTA (L)	1
rps4	266	89	103	CCA (P) => CTA (L)	0.83
rps4	278	93	107	TCG (S) => TTG (L)	0.67
rps4	290	97	111	CCG (P) => CTG (L)	0.83
rps4	335	112	126	CCG (P) => CTG (L)	1
rps4	482	161	175	TCA (S) => TTA (L)	1
rps4	905	302	349	TCG (S) => TTG (L)	0.83
rps4	916	306	353	CAT (H) => TAT (Y)	0.83
rps4	926	309	356	CCA (P) => CTA (L)	0.67
rps4	941	314	361	TCT (S) => TTT (F)	1
rps4	992	331	378	CCA (P) => CTA (L)	0.83
rps4	1006	336	383	CGG (R) => TGG (W)	1
rps7	179	60	85	ACT (T) => ATT (I)	0.62
rps7	181	61	86	CAT (H) => TAT (Y)	0.62
sdh3	74	25	25	TCC (S) => TTC (F)	1
sdh3	191	64	64	TCA (S) => TTA (L)	0.43
sdh4	155	52	52	CCA (P) => CTA (L)	0.88
sdh4	203	68	68	CCA (P) => CTA (L)	0.75
sdh4	259	87	87	CAT (H) => TAT (Y)	0.88
sdh4	353	118	118	TCT (S) => TTT (F)	0.5

## Sheet: Table S7
Table S7 Distribution of gene clusters in plants mt genomes.
Gene clusters	Capsicum pubesens Ruiz&Pav	Capsicum annuum cultivar Jeju	Capsicum chinense	Solanum sisymbriifolium	Nicotiana attenuata	Osmanthus fragrans	Chionanthus rupicola	Peganum harmala
trnS-trnF-trnP	+	+	+	+	+	+	+	-
rps10-cox1(cir1)	+	-	-	+	+	-	-	/
rrn18-rrn5	+	+	+	+	+	+	+	-
(cob)-(rps14)-rpl5	+	+	+	+	+	+	+	+
(atp8)-cox3-sdh4	+	+	+	/	+	+	+	+
rps13-nad1	+	+	+	+	+	+	+	/
atp4-nad4L	+	/	+	/	+	+	-	+
rrn26-trnM	+	+	+	+	+	-	-	+
rpl2-rpl10	+	+	+	+	+	-	-	/
nad9-(trnP)-trnW	+	+	+	+	+	+	+	-
trnC-trnN-trnY-nad2	+	+	+	+	+	+	+	+
rps12-nad3	+	+	+	+	+	+	+	/
nad1-matR	+	+	+	+	+	+	+	/
sdh3-nad2	+	+	+	+	+	+	+	/
ccmC-trnL/trnM	+	+	+	+	+	+	+	-
(rps19)-rps3-rpl16-(cox2)	+	+	+	+	+	+	+	+
nad6-rps4	-	-	-	+	+	+	+	-
Note: "+", indicates that the cluster exists in plant mtDNA; "-", indicates that the cluster is absent in plant mtDNA; "/", indicates that the cluster is lost.

## Sheet: Table S8
Table S8 Selecting plant species to construct a phylogenetic tree.
Plant species	accession numbers
Capsicum annuum cultivar Jeju	KJ865410
Capsicum annuum cultivar CMS	KJ865409
Capsicum chinense	MZ736638-MZ736639
Solanum lycopersicum	NC_035963
Solanun tuberosum	MF989958-MF989959
Solanum sisymbriifolium	MT122964-MT122965
Nicotiana tabacum	NC_006581
Nicotiana attenuata	MF579563
Chionanthus rupicola	MG372115
Osmanthus fragrans	MW645067
Beta vulgaris	NC_002511
Silene latifolia	NC_014487
Brassica juncea	NC_016123
Brassica rapa	NC_049892
Brassica napus	AP006444
Arabidopsis thaliana	NC_037304
Carica papaya	NC_012116
Peganum harmala	MK431826
Vigna radiata	HM367685
Glycine max	JX463295
Vicia faba	KC189947
Cucurbita pepo	GQ856148
Citrullus lanatus	NC_014043
Oryza sativa Indica	NC_007886

## Sheet: Table S9
Table S9 The coding gene content of the mitochondrial genome of Capsicum pubescens Ruiz&Pav.
Circle 1
Gene	Start	End	Length	Strand
trnM(cat)	353	425	73	-
trnS(gct)	11284	11371	88	+
trnF(gaa)	11735	11808	74	+
trnP(tgg)	12061	12135	75	+
nad1	13395	13652	258	+
atp6	18443	19297	855	+
rps10	24601	24850	250	+
rps10	25626	25738	113	+
cox1	28561	30144	1584	+
rps7	<30366	30761	396	+
nad4	39030	39118	89	-
nad4	41774	42196	423	-
nad4	45330	45844	515	-
nad4	47256	47716	461	-
trnR(acg)	52766	52839	74	-
Circle 2
Gene	Start	End	Length	Strand
trnD(gtc)	761	834	74	-
trnS(tga)	7553	7639	87	+
rns	14127	16074	1948	+
rrn5	16238	16355	118	+
cob	26230	27411	1182	-
rpl5	29067	29621	555	-
ccmFn	34533	36302	1770	-
mttB	56214	57038	825	+
atp9	69308	69541	234	-
Circle 3
Gene	Start	End	Length	Strand
nad5	103957	104184	228	+
nad5	105029	106246	1218	+
nad5	29777	29798	22	-
nad1	197420	197807	388	-
nad1	16426	16505	80	+
nad1	17996	18187	192	+
atp8	8154	8624	471	+
cox3	9265	10062	798	+
sdh4	9990	10367	378	+
rps13	15533	15883	351	+
nad4L	20637	20939	303	+
atp4	21128	21724	597	+
rps4	30218	31255	1038	-
rps1	31518	31946	429	-
trnM(cat)	48678	48751	74	+
rnl	49320	52866	3547	+
ccmFc	60182	60949	768	+
ccmFc	61904	62452	549	+
trnM(cat)	66184	66257	74	-
rpl2	75377	76257	881	+
rpl2	78226	78343	118	+
rpl10	78632	79111	480	+
ccmB	79387	80007	621	-
trnK(ttt)	82549	82621	73	+
trnH(gtg)	85443	85516	74	+
nad9	89245	89817	573	+
trnP(tgg)	90684	90757	74	+
trnW(cca)	90915	90988	74	+
trnC(gca)	109261	109331	71	+
trnN(gtt)	111461	111532	72	+
trnY(gta)	112068	112150	83	+
nad2	112668	112828	161	+
nad2	115289	115861	573	+
nad2	117330	117517	188	+
atp1	131240	132769	1530	+
trnE(ttc)	138151	138222	72	-
trnQ(ttg)	139910	139981	72	-
trnG(gcc)	142442	142513	72	-
rps12	149442	149819	378	-
nad3	149868	150224	357	-
cox1	150356	151684	1329	-
trnL(caa)	162778	162851	74	+
nad7	167365	167507	143	+
nad7	168423	168491	69	+
nad7	169951	170661	711	+
nad7	172404	172665	262	+
trnI(cat)	185901	185974	74	-
trnD(gtc)	204364	204437	74	-
trnY(gta)	204550	204633	84	-
trnE(ttc)	204693	204765	73	-
trnT(ggt)	205486	205557	72	+
Circle 4
Gene	Start	End	Length	Strand
nad1	18838	18894	57	+
matR	19558	21534	1977	+
nad5	26105	26251	147	-
nad5	27343	27737	395	-
trnL(caa)	31950	32030	81	+
nad6	40484	41140	657	-
sdh3	62445	62771	327	+
nad2	63351	63503	153	+
nad2	64529	64920	392	+
trnM(cat)	71336	71400	65	-
ccmC	77251	78003	753	+
trnL(caa)	77990	78063	74	+
cox2	87512	87897	386	-
cox2	88812	89193	382	-
rpl16	89442	89957	516	-
rps3	89848	91459	1612	-
rps3	92536	92609	74	-
rps19	92623	92907	285	-
